# Supplementary material for: Variations in DENSE AND ERECT PANICLE 1 (DEP1) contribute to the diversity of the panicle trait in high-yielding japonica rice varieties in northern China
Source: PubMed Central journal article supplement — Breed Sci. 2016 Jul 27;66(4):599–605. doi: 10.1270/jsbbs.16058 (PMC5010314; doi:10.1270/jsbbs.16058), 2016-07-27
Supplement: 66_16058_1.pdf [file 66_16058_1.pdf]

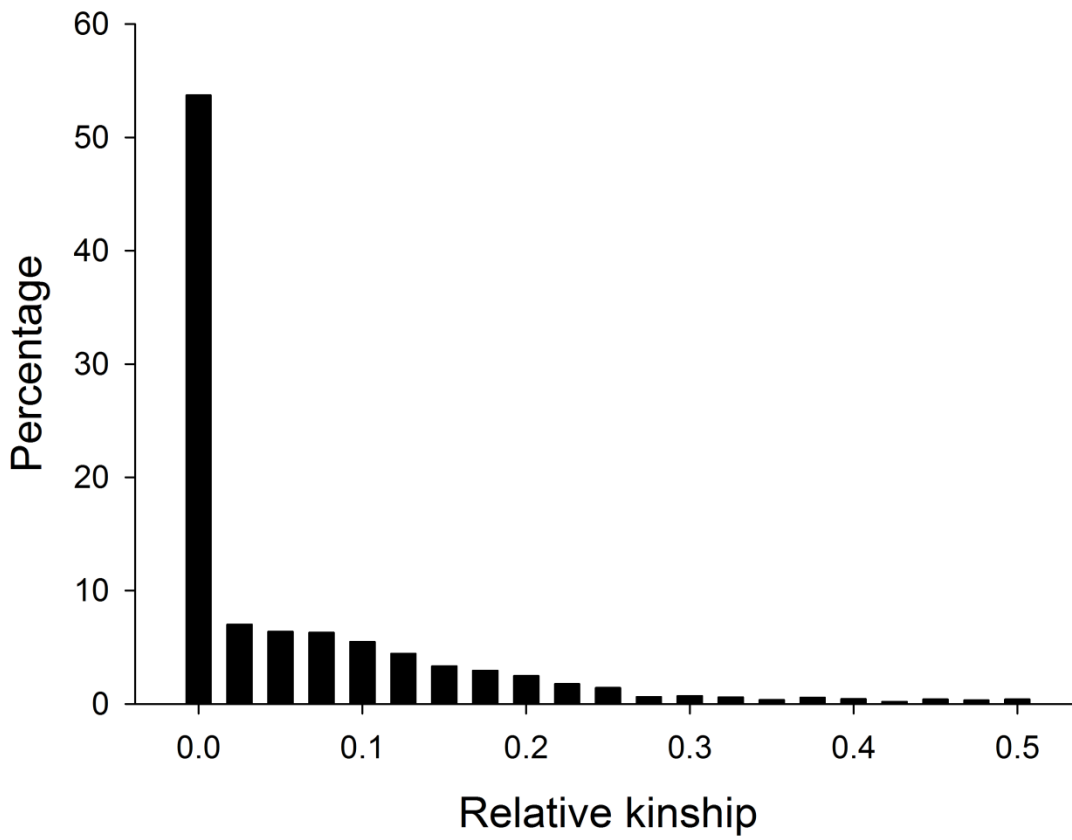

Supplemental Fig.2. Distribution of pairwise relative kinship coefficients between 72 rice varieties.

Values are from SPAGeDi estimates using 58 DNA markers. For simplicity, only percentages of relative kinship estimates ranging from 0 to 0.50 are shown.

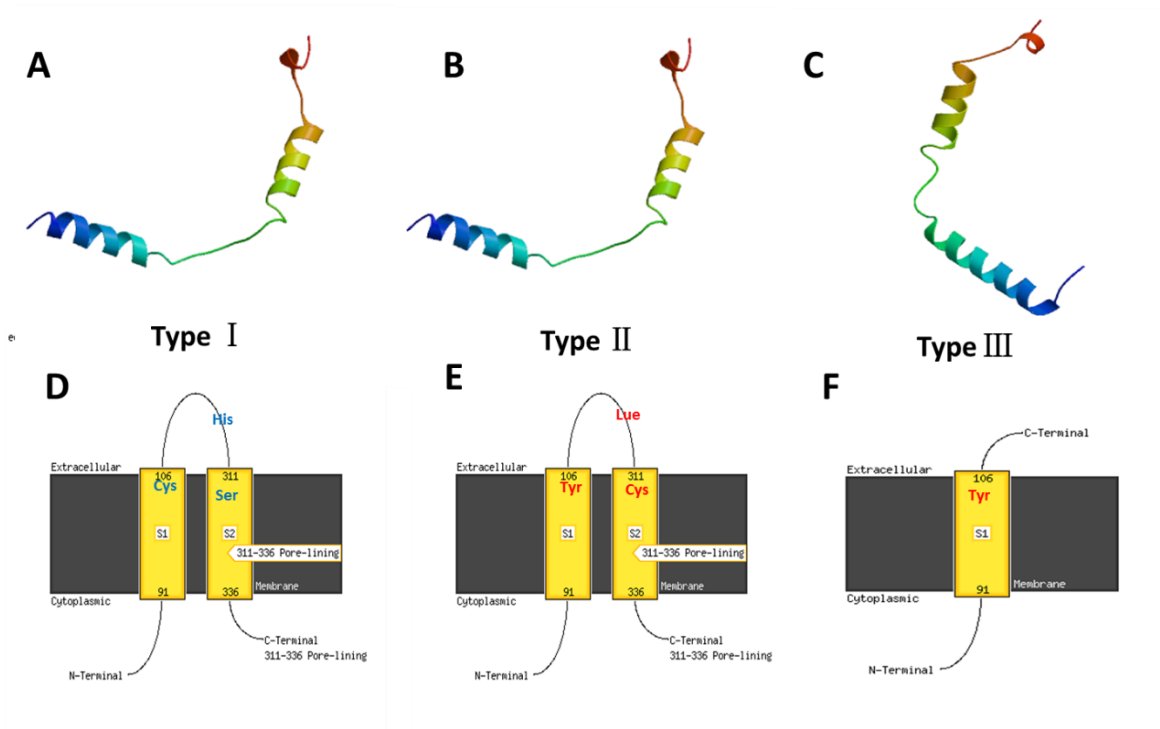

Supplemental Fig.3. Secondary and transmembrane structures of protein types I, II, and III.
