# Supplementary material for: Variations in DENSE AND ERECT PANICLE 1 (DEP1) contribute to the diversity of the panicle trait in high-yielding japonica rice varieties in northern China
Source: PubMed Central journal article supplement — Breed Sci. 2016 Jul 27;66(4):599–605. doi: 10.1270/jsbbs.16058 (PMC5010314; doi:10.1270/jsbbs.16058), 2016-07-27
Supplement: 66_16058_2.pdf [file 66_16058_2.pdf]

Supplemental Table 1. High yielding japonica varieties used in this study

| Cultivars   | Origin       | Subspecies      | Released decades |
|-------------|--------------|-----------------|------------------|
| Baimaodao   | Heilongjiang | <i>Japonica</i> | 1970-1979        |
| Hejiang15   | Heilongjiang | <i>Japonica</i> | 1970-1979        |
| Hejiang19   | Heilongjiang | <i>Japonica</i> | 1970-1979        |
| Dongnong415 | Heilongjiang | <i>Japonica</i> | 1980-1989        |
| Hejiang20   | Heilongjiang | <i>Japonica</i> | 1980-1989        |
| Hejiang21   | Heilongjiang | <i>Japonica</i> | 1980-1989        |
| Kendao2     | Heilongjiang | <i>Japonica</i> | 1980-1989        |
| Dongnong419 | Heilongjiang | <i>Japonica</i> | 1990-1999        |
| Kendao10    | Heilongjiang | <i>Japonica</i> | 1990-1999        |
| Kendao11    | Heilongjiang | <i>Japonica</i> | 1990-1999        |
| Kendao8     | Heilongjiang | <i>Japonica</i> | 1990-1999        |
| Longjing8   | Heilongjiang | <i>Japonica</i> | 1990-1999        |
| Dongnong425 | Heilongjiang | <i>Japonica</i> | 2000-2009        |
| Longdao3    | Heilongjiang | <i>Japonica</i> | 2000-2009        |
| Longdao5    | Heilongjiang | <i>Japonica</i> | 2000-2009        |
| Longjing13  | Heilongjiang | <i>Japonica</i> | 2000-2009        |
| Longjing14  | Heilongjiang | <i>Japonica</i> | 2000-2009        |
| Longjing31  | Heilongjiang | <i>Japonica</i> | 2000-2009        |
| Songjing9   | Heilongjiang | <i>Japonica</i> | 2000-2009        |
| Jijing53    | Jilin        | <i>Japonica</i> | 1970-1979        |
| Jijing56    | Jilin        | <i>Japonica</i> | 1970-1979        |
| Jijing60    | Jilin        | <i>Japonica</i> | 1970-1979        |
| Guandong107 | Jilin        | <i>Japonica</i> | 1980-1989        |
| Jijing62    | Jilin        | <i>Japonica</i> | 1980-1989        |
| Jijing63    | Jilin        | <i>Japonica</i> | 1980-1989        |
| Xingguo     | Jilin        | <i>Japonica</i> | 1980-1989        |
| Changbai9   | Jilin        | <i>Japonica</i> | 1990-1999        |
| Chaochan1   | Jilin        | <i>Japonica</i> | 1990-1999        |
| Jijing67    | Jilin        | <i>Japonica</i> | 1990-1999        |
| Jiyujing    | Jilin        | <i>Japonica</i> | 1990-1999        |
| Changbai13  | Jilin        | <i>Japonica</i> | 2000-2009        |
| Ji2813      | Jilin        | <i>Japonica</i> | 2000-2009        |
| Jijing105   | Jilin        | <i>Japonica</i> | 2000-2009        |
| Jijing95    | Jilin        | <i>Japonica</i> | 2000-2009        |
| Yanjing23   | Jilin        | <i>Japonica</i> | 2000-2009        |
| Hanfeng     | Liaoning     | <i>Japonica</i> | 1970-1979        |
| Liaojing5   | Liaoning     | <i>Japonica</i> | 1980-1989        |
| Liaojing294 | Liaoning     | <i>Japonica</i> | 1990-1999        |
| Liaojing371 | Liaoning     | <i>Japonica</i> | 1990-1999        |
| Liaojing454 | Liaoning     | <i>Japonica</i> | 1990-1999        |
| Liaojing9   | Liaoning     | <i>Japonica</i> | 1990-1999        |
| Liaoyan2    | Liaoning     | <i>Japonica</i> | 1990-1999        |

---

|                     |          |                 |           |
|---------------------|----------|-----------------|-----------|
| Tiejing2            | Liaoning | <i>Japonica</i> | 1990-1999 |
| Changlixingzhilisui | Liaoning | <i>Japonica</i> | 2000-2009 |
| Huadan995           | Liaoning | <i>Japonica</i> | 2000-2009 |
| Liaoxing1           | Liaoning | <i>Japonica</i> | 2000-2009 |
| Liaoxing16          | Liaoning | <i>Japonica</i> | 2000-2009 |
| Liaoxing17          | Liaoning | <i>Japonica</i> | 2000-2009 |
| Qianchonglang2      | Liaoning | <i>Japonica</i> | 2000-2009 |
| Shendao29           | Liaoning | <i>Japonica</i> | 2000-2009 |
| Shendao3            | Liaoning | <i>Japonica</i> | 2000-2009 |
| Shendao6            | Liaoning | <i>Japonica</i> | 2000-2009 |
| Shendao9            | Liaoning | <i>Japonica</i> | 2000-2009 |
| Shenjing4311        | Liaoning | <i>Japonica</i> | 2000-2009 |
| Shennong265         | Liaoning | <i>Japonica</i> | 2000-2009 |
| Shennong606         | Liaoning | <i>Japonica</i> | 2000-2009 |
| Shennong9741        | Liaoning | <i>Japonica</i> | 2000-2009 |
| Yanfeng47           | Liaoning | <i>Japonica</i> | 2000-2009 |
| Nipponbare          | Japan    | <i>Japonica</i> | 1950-1959 |
| Chuxing             | Japan    | <i>Japonica</i> | 1970-1979 |
| Fengjin             | Japan    | <i>Japonica</i> | 1970-1979 |
| Qiuguang            | Japan    | <i>Japonica</i> | 1970-1979 |
| Xindai              | Japan    | <i>Japonica</i> | 1980-1989 |
| Yimuhu              | Japan    | <i>Japonica</i> | 1980-1989 |
| Kongyu131           | Japan    | <i>Japonica</i> | 1990-1999 |
| Qiutianxiaoding     | Japan    | <i>Japonica</i> | 1990-1999 |
| Huachuilei          | Japan    | <i>Japonica</i> |           |
| Huaxiang            | Japan    | <i>Japonica</i> |           |
| Lige                | Japan    | <i>Japonica</i> |           |
| Muyu                | Japan    | <i>Japonica</i> |           |
| Wuji                | Japan    | <i>Japonica</i> |           |
| Yanshouchuanshou    | Japan    | <i>Japonica</i> |           |

---

Supplemental Table 2. Primer sequences for sequencing the *DEP1* locus

|        | Forward primer (5'-3')     | Reverse primer (5'-3')     |
|--------|----------------------------|----------------------------|
| DEP1-1 | GAATTCGTCTCTCAGTGAGCCGTTCC | GGATCCTCATGGGCATTATAGCAGCA |
| DEP1-2 | GACAGCGTATCCAACGTAGGCTC    | GCAAAGACATGAAATGCAGATACAC  |
| DEP1-3 | TTCGTA CTGGTCAATTACTCCAGG  | TTGAGGCACCTTGGTCTTTTGA     |
| DEP1-4 | AGAGAAGGAGGCACAGATCTTGCC   | GCATGAAGGGCAGTAGTACATACTC  |
| DEP1-5 | GTCGTAACCCATGCTGTCTCA      | TTGGCGAGTAAATGAGTCCAA      |

Supplemental Table 3. Primer sequences used to analysis the population structure

| QTLs           | Chromosome | Marker  | Forward primer (5'-3')    | Reverse primer (5'-3')    |                        |
|----------------|------------|---------|---------------------------|---------------------------|------------------------|
| <i>Gn1a</i>    | 1          | Gn1a-M  | CTCTTGCTTCATTATCAATC      | AAACTACACAAGAATCTGCT      | InDel                  |
| <i>GW1-1</i>   | 1          | RM10376 | TTAGTTTAACCGCACCGTACACC   | GGTCGTTGAATTGGTGTC AAGC   | SSR                    |
| <i>GW1-2</i>   | 1          | RM10404 | CTGGAGTGGTTTCTCTCCTCTGC   | TACTCTGCTCGCGTAACTTCTCC   | SSR                    |
| <i>qGRL1</i>   | 1          | RM431   | GCTTGCTTGTATCTGCATTGGTAGG | GGGATGATCCACTCTCTGTTTGG   | SSR                    |
| <i>SPP1</i>    | 1          | YN37    | GACCTCCCTCCTATCGTAATGA    | CAAGGAGGGAAGGACAACAA      | InDel                  |
| <i>GW2</i>     | 2          | GW2     | CCAATAAAGATGTCCATTCTGTTA  | GCTCTTCCTGTAACACATATTATG  | dCaps ( <i>Hpa</i> I ) |
| <i>LGS1</i>    | 2          | RM13838 | CCCAACTGCTAGGTTTCTGATCC   | ACTGTGTTACTGTGTGCCGTTGC   | SSR                    |
| <i>qGY2-1</i>  | 2          | RM279   | GCGGGAGAGGGATCTCCT        | GGCTAGGAGTTAACCTCGCG      | SSR                    |
| <i>qSPP2</i>   | 2          | MRG2762 | CATGCTAGTAAGCAAAGGGCAACG  | TTGCACGTCCAAGTCCAAGC      | SSR                    |
| <i>Quality</i> | 2          | RM3515  | CATGCTAGTAAGCAAAGGGCAACG  | TTGCACGTCCAAGTCCAAGC      | SSR                    |
| <i>Quality</i> | 2          | RM5470  | CGTGTATTGCATGGATTGTCTGG   | CGGAACCCACAATTTCTTTCTGC   | SSR                    |
| <i>GS3</i>     | 3          | GS3     | TATTTATTGGCTTGATTCCTGTG   | GCTGGTTTTTTACTTTCATTTGCC  | Caps ( <i>Pst</i> I )  |
| <i>GW3</i>     | 3          | WGW19   | ACCAAAATGGAATACCGAACG     | TAACAACACGCAATAGAAGG      | InDel                  |
| <i>gw3.1</i>   | 3          | RM640   | GGGTACAACGAGAGGGATGA      | CAGCCAGCATAATTTAGCC       | SSR                    |
| <i>qGL3-1</i>  | 3          | BM14    | CAACGTAGGGAGGAGGAC        | GAGAGGAGAGTGTGGCATT       | InDel                  |
| <i>qTGW3-1</i> | 3          | RM5477  | GCACGCATTGTTTCGTGATAGG    | GAACCGAACGCAAAGCTAATACC   | SSR                    |
| <i>Quality</i> | 3          | RM523   | TGAATTCTTGACATGGTCAGC     | TGGGAGGTTTGCTAGGGTAATCC   | SSR                    |
| <i>Quality</i> | 3          | RM60    | CAAGTTCACCCGCCTTCTCG      | TTCCATCATTAGCAGGCAGTAGC   | SSR                    |
| <i>Quality</i> | 3          | RM6349  | ATGATGCCTCATGTCTCTGATCTCC | AGATGAACACGACCGATAGGATAGG | SSR                    |
| <i>GIF1</i>    | 4          | SSR1    | GAGAGGGGAATCAACATACAC     | GACATACCTAGCTCTGAACGAATT  | SSR                    |
| <i>qGL4b</i>   | 4          | RM1165  | CTAGGACGAAGGGGAAGGAC      | ACCACCACCATCCAAACTC       | SSR                    |
| <i>Chalk5</i>  | 5          | C35     | GTTTGCATCTCTCTTTGCTG      | CAAGAGGAACTCATCTGTAG      | InDel                  |
| <i>GS5</i>     | 5          | C62     | GATTGACTGATAAATTGACAGC    | CTAACTCCCATGGAATTAC       | InDel                  |

|                |   |         |                                |                              |                       |
|----------------|---|---------|--------------------------------|------------------------------|-----------------------|
| <i>GS5</i>     | 5 | RM574   | AAACTAGCCACGGTTTGGTAGGG        | AGGGTGGCAGGGATGTAATTTCC      | SSR                   |
| <i>gw5</i>     | 5 | Indel1  | AGTACGACCATGATGTTTCCC          | GACCTAACCCATCTCATTCCA        | InDel                 |
| <i>qSW5</i>    | 5 | qSW5    | CGTCTTGCAACCAACGCCGATGTTA<br>T | GAGCGTGTGTAGGGAAGGAGCTGCATGA | InDel                 |
| <i>SGL</i>     | 5 | D6      | CGAAAGAAACCAAGGC               | CTATTATTGGCACAAGGAA          | InDel                 |
| <i>srs3</i>    | 5 | 3151    | TTTTGTGGTCCCCTGATTCAG          | CCTCCACTTAGCACCGTGCT         | InDel                 |
| <i>Quality</i> | 5 | RM3575  | ACAGCCTCAAATTGTGAGCAAGG        | GCTGTATGATCTGTATCCATCCATCC   | SSR                   |
| <i>GW6</i>     | 6 | RM7179  | CACGTGTCAGCTTAAGAGCG           | TTACATCATAAGCCCGCAGG         | SSR                   |
| <i>gw6a</i>    | 6 | xj-6    | AGCCAAGAAGCAAGAACTCA           | ACCTCAACCTGTGCTCAA           | InDel                 |
| <i>qSPP6</i>   | 6 | RM20521 | CAGTCTTGATTGCAGCTGTACC         | AGTCTGCTGTCTGATGTCAACC       | SSR                   |
| <i>tgw6</i>    | 6 | InDel-1 | GAGAAAGTGACCCTCGTTTAGT         | CAAGACATGACACTACGATTGC       | InDel                 |
| <i>TGW6</i>    | 6 | TGW6    | CCACAGCCACAACGAGAAT            | ACCGTTCGGGTAGGTTATGT         | Caps( <i>BssHII</i> ) |
| <i>Ur1</i>     | 6 | SSR17   | CCCTTGCTAAGCTAGCCC             | CAGCGAATGTACGAAGAAGC         | SSR                   |
| <i>Quality</i> | 6 | RM1161  | CTTTGCAAACCTGCCATCCAATCC       | GATGGGCAAGGAGGCTGGTAGC       | SSR                   |
| <i>Quality</i> | 6 | RM1369  | CATCGATTAGCTTACATGGCAACG       | ACTAGTGCAGCCGTCTTCAATGG      | SSR                   |
| <i>Quality</i> | 6 | RM19660 | TTTGTCCCTGCCGTACTIONTGC        | AGCCACGTTGGGTGAAATTAGC       | SSR                   |
| <i>Quality</i> | 6 | RM587   | TTCCCATCTGCACTACCATAATCC       | GAGCAGAGATGTGCTTTGCTACC      | SSR                   |
| <i>Quality</i> | 6 | RM589   | GTGGCTTAACCACATGAGAACTAC<br>C  | TCACATCATTAGGTGGCAATCG       | SSR                   |
| <i>Quality</i> | 6 | RM8101  | GTGTAGTTACGACCAATGATACGC       | TATAATGAGTTCGAGCCGATCC       | SSR                   |
| <i>Quality</i> | 6 | RM8120  | TACACGCTAGCTGCTATGACTGC        | TTCAACTAGCTAGCCACCTACACC     | SSR                   |
| <i>BG2</i>     | 7 | S2      | CTCCTCCTCCACCGACCA             | TAACGTGTGTTGCGTTGC           | SSR                   |
| <i>gpa7</i>    | 7 | 3617    | GGATGGATTTGAAGGATTTG           | AACCACTTCATTCACCACCC         | InDel                 |
| <i>GS7</i>     | 7 | FMGS7   | ATGGTCAAATCATGGGCTA            | TTATTGTGCCTGCGATCC           | InDel                 |
| <i>qGL7</i>    | 7 | RID76   | CACCGAAGACTGATCAGCAA           | TCACATTCGAGTGGAGCAAC         | InDel                 |
| <i>qGL7-2</i>  | 7 | RM21936 | ATGCATGTCTGTCTGCACTCTGC        | AGATTTCTTGCGCGTCTGAATCC      | SSR                   |

|                |    |         |                          |                          |                       |
|----------------|----|---------|--------------------------|--------------------------|-----------------------|
| <i>qSPP7</i>   | 7  | RM5436  | CAAAGGGGGTGTCTCTATG      | GTTGCTCGTCCTACATGTGC     | SSR                   |
| <i>qSS7</i>    | 7  | DGS220  | AAATGAGTTTAAGTCGGCTGGA   | GGAACGGTTTTGTTGGTTGA     | InDel                 |
| <i>GW8</i>     | 8  | PSM709  | TCACTGATTCCTTTTACgTTT    | GCTCAGTTGCTTCTTCATTAGA   | InDel                 |
| <i>gw8.1</i>   | 8  | RM23211 | ACTTGGTCCATCCTGCTGAG     | ACCAGTCGCTGTGGTGAAG      | SSR                   |
| <i>IPA1</i>    | 8  | IPA1    | CCAGAAGAGCATCGCAGGTTCA   | TGCAGAGCAAGCTCAAGCTCAC   | Caps ( <i>sdu I</i> ) |
| <i>qSpp8</i>   | 8  | RM310   | GACTTGTGGTTGTTGCTTGTGG   | ACTGCCATATGCATTTCCCTAGC  | SSR                   |
| <i>gw9.1</i>   | 9  | RM24718 | GACCAACGTGCATGTGACTT     | GCTTGCACTAGGGCTCCT       | SSR                   |
| <i>Quality</i> | 10 | RM2887  | CGTAGATTGTGGTGGGTCTGTCC  | CTTGTTGGAAGCAAATCCCTTTCG | SSR                   |
| <i>Quality</i> | 12 | RM1246  | GGCTCACCTCGTTCTCGATCC    | CATAAATAAATAGGGCGCCACACC | SSR                   |
| <i>Quality</i> | 12 | RM1300  | TTGCTACTACCACAACAGGGTTCC | GCAGCCACAGCTTTGAATAGAGC  | SSR                   |
| <i>Quality</i> | 12 | RM2529  | GCAACTATTACAGTGACGCTTTGC | GTGAGGCATTCCTGATATGATCG  | SSR                   |

Supplemental Table 4. The detail information of the 45 SNPs and 26 indels

| Region   | Position (bp) | Allele  | Type  | Frequency (%) | Region   | Position (bp) | Allele     | Type  | Frequency (%) |
|----------|---------------|---------|-------|---------------|----------|---------------|------------|-------|---------------|
| Promoter | -1983         | 0bp/1bp | Indel | 1.39          | Exon 3   | 2554          | G/T        | SNP   | 1.39          |
| Promoter | -1913         | G/T     | SNP   | 1.39          | Intron 3 | 2662          | 0bp/1bp    | Indel | 1.39          |
| Promoter | -1865         | G/C     | SNP   | 1.39          | Exon 4   | 2694          | 1bp/0bp    | Indel | 1.39          |
| Promoter | -1302         | 1bp/0bp | Indel | 2.78          | Intron 4 | 2720          | T/G        | SNP   | 1.39          |
| Promoter | -1253         | C/G     | SNP   | 56.94         | Intron 4 | 2767          | C/T        | SNP   | 1.39          |
| Promoter | -1250         | 1bp/0bp | Indel | 1.39          | Exon 5   | 3164          | C/A        | SNP   | 1.39          |
| Promoter | -1170         | 1bp/0bp | Indel | 1.39          | Exon 5   | 3177          | C/A        | SNP   | 1.39          |
| Promoter | -1066         | 0bp/1bp | Indel | 1.39          | Exon 5   | 3182          | C/A        | SNP   | 1.39          |
| Promoter | -1064         | 0bp/1bp | Indel | 1.39          | Exon 5   | 3184          | A/G        | SNP   | 2.78          |
| Promoter | -1061         | 0bp/1bp | Indel | 1.39          | Exon 5   | 3183          | C/A        | SNP   | 1.39          |
| Promoter | -1058         | G/A     | SNP   | 1.39          | Exon 5   | 3240          | C/A        | SNP   | 1.39          |
| Promoter | -1052         | G/A     | SNP   | 1.39          | Exon 5   | 3246          | 1bp/0bp    | Indel | 1.39          |
| Promoter | -960          | T/A     | SNP   | 1.39          | Exon 5   | 3249          | C/G        | SNP   | 1.39          |
| Promoter | -959          | 0bp/1bp | Indel | 1.39          | Exon 5   | 3273          | C/A        | SNP   | 1.39          |
| Promoter | -817          | 1bp/0bp | Indel | 1.39          | Exon 5   | 3285          | C/G        | SNP   | 1.39          |
| Promoter | -790          | C/A     | SNP   | 1.39          | Exon 5   | 3290          | C/G        | SNP   | 1.39          |
| Promoter | -715          | 1bp/0bp | Indel | 1.39          | Exon 5   | 3301          | T/A        | SNP   | 1.39          |
| Promoter | -583          | A/G     | SNP   | 1.39          | Exon 5   | 3336          | T/C        | SNP   | 1.39          |
| Promoter | -582          | T/G     | SNP   | 1.39          | Exon 5   | 3363          | C/T        | SNP   | 1.39          |
| Promoter | -581          | 1bp/0bp | Indel | 1.39          | Exon 5   | 3423          | C/A        | SNP   | 1.39          |
| Promoter | -547          | A/G     | SNP   | 1.39          | Exon 5   | 3457          | 12bp/637bp | Indel | 25            |
| Promoter | -526          | C/A     | SNP   | 1.39          | Exon 5   | 3473          | T/G        | SNP   | 1.39          |
| Promoter | -493          | C/G     | SNP   | 1.39          | Exon 5   | 3534          | 1bp/0bp    | Indel | 1.39          |

|          |      |         |       |      |        |      |         |       |      |
|----------|------|---------|-------|------|--------|------|---------|-------|------|
| Promoter | -424 | 1bp/0bp | Indel | 9.72 | Exon 5 | 3551 | T/A     | SNP   | 2.78 |
| 5'-UTR   | -324 | C/G     | SNP   | 1.39 | Exon 5 | 3571 | 1bp/0bp | Indel | 1.39 |
| 5'-UTR   | -200 | C/G     | SNP   | 1.39 | Exon 5 | 3574 | 0bp/1bp | Indel | 1.39 |
| 5'-UTR   | -198 | C/G     | SNP   | 1.39 | Exon 5 | 3625 | 0bp/1bp | Indel | 1.39 |
| 5'-UTR   | -197 | T/G     | SNP   | 1.39 | Exon 5 | 3634 | 0bp/1bp | Indel | 1.39 |
| 5'-UTR   | -181 | G/A     | SNP   | 2.78 | Exon 5 | 3682 | G/T     | SNP   | 1.39 |
| Exon 1   | 19   | 1bp/0bp | Indel | 1.39 | Exon 5 | 3711 | 0bp/1bp | Indel | 1.39 |
| Intron 1 | 278  | G/C     | SNP   | 1.39 | Exon 5 | 3838 | T/A     | SNP   | 2.78 |
| Intron 1 | 500  | 0bp/2bp | Indel | 5.56 | 3'-UTR | 4158 | T/C     | SNP   | 1.39 |
| Intron 1 | 564  | 0bp/1bp | Indel | 6.94 | 3'-UTR | 4173 | T/C     | SNP   | 2.78 |
| Intron 1 | 1243 | C/A     | SNP   | 1.39 | 3'-UTR | 4222 | T/G     | SNP   | 1.39 |
| Intron 1 | 1268 | A/G     | SNP   | 1.39 | 3'-UTR | 4308 | C/A     | SNP   | 2.78 |
| Intron 2 | 1832 | 0bp/1bp | Indel | 9.72 |        |      |         |       |      |



Supplemental Table 5. Haplotype and protein types of the 72 germplasms used in this study

| Cultivars           | Origin       | Subpop.   | G-C alleles | <i>DEP1-dep1</i> alleles | Haplotype | Protein type | Population Structure |       |
|---------------------|--------------|-----------|-------------|--------------------------|-----------|--------------|----------------------|-------|
|                     |              |           |             |                          |           |              | Q1                   | Q2    |
| Yanfeng47           | Liaoning     | Subgroup1 | G           | <i>dep1</i>              | H1        | TypeIII      | 0.567                | 0.433 |
| Ji2813              | Jilin        | Subgroup1 | G           | <i>dep1</i>              | H2        | TypeIII      | 0.974                | 0.026 |
| Changlixingzhilisui | Liaoning     | Subgroup1 | G           | <i>dep1</i>              | H2        | TypeIII      | 0.978                | 0.022 |
| Qianchonglang2      | Liaoning     | Subgroup1 | G           | <i>dep1</i>              | H2        | TypeIII      | 0.540                | 0.460 |
| Hejiang15           | Heilongjiang | Subgroup1 | C           | <i>DEP1</i>              | H4        | Type II      | 0.966                | 0.034 |
| Kendao10            | Heilongjiang | Subgroup1 | C           | <i>DEP1</i>              | H4        | Type II      | 0.967                | 0.033 |
| Kendao8             | Heilongjiang | Subgroup1 | C           | <i>DEP1</i>              | H4        | Type II      | 0.975                | 0.025 |
| Longdao3            | Heilongjiang | Subgroup1 | C           | <i>DEP1</i>              | H4        | Type II      | 0.942                | 0.058 |
| Songjing9           | Heilongjiang | Subgroup1 | C           | <i>DEP1</i>              | H4        | Type II      | 0.987                | 0.013 |
| Kongyu131           | Japan        | Subgroup1 | C           | <i>DEP1</i>              | H4        | Type II      | 0.992                | 0.008 |
| Nipponbare          | Japan        | Subgroup1 | C           | <i>DEP1</i>              | H4        | Type II      | 0.723                | 0.277 |
| Qiuguang            | Japan        | Subgroup1 | C           | <i>DEP1</i>              | H4        | Type II      | 0.865                | 0.135 |
| Jijing105           | Jilin        | Subgroup1 | C           | <i>DEP1</i>              | H4        | Type II      | 0.980                | 0.020 |
| Jijing56            | Jilin        | Subgroup1 | C           | <i>DEP1</i>              | H4        | Type II      | 0.965                | 0.035 |
| Jijing60            | Jilin        | Subgroup1 | C           | <i>DEP1</i>              | H4        | Type II      | 0.923                | 0.077 |
| Jijing67            | Jilin        | Subgroup1 | C           | <i>DEP1</i>              | H4        | Type II      | 0.933                | 0.067 |
| Jijing95            | Jilin        | Subgroup1 | C           | <i>DEP1</i>              | H4        | Type II      | 0.967                | 0.033 |
| Yanjing23           | Jilin        | Subgroup1 | C           | <i>DEP1</i>              | H4        | Type II      | 0.776                | 0.224 |
| Hanfeng             | Liaoning     | Subgroup1 | C           | <i>DEP1</i>              | H4        | Type II      | 0.987                | 0.013 |
| Tiejing2            | Liaoning     | Subgroup1 | C           | <i>DEP1</i>              | H4        | Type II      | 0.952                | 0.048 |
| Xingguo             | Jilin        | Subgroup1 | G           | <i>DEP1</i>              | H5        | Type II      | 0.990                | 0.010 |
| Dongnong415         | Heilongjiang | Subgroup1 | G           | <i>DEP1</i>              | H6        | Type II      | 0.987                | 0.013 |
| Dongnong419         | Heilongjiang | Subgroup1 | G           | <i>DEP1</i>              | H6        | Type II      | 0.903                | 0.097 |
| Dongnong425         | Heilongjiang | Subgroup1 | G           | <i>DEP1</i>              | H6        | Type II      | 0.987                | 0.013 |
| Hejiang19           | Heilongjiang | Subgroup1 | G           | <i>DEP1</i>              | H6        | Type II      | 0.984                | 0.016 |
| Hejiang20           | Heilongjiang | Subgroup1 | G           | <i>DEP1</i>              | H6        | Type II      | 0.972                | 0.028 |
| Hejiang21           | Heilongjiang | Subgroup1 | G           | <i>DEP1</i>              | H6        | Type II      | 0.990                | 0.010 |
| Kendao11            | Heilongjiang | Subgroup1 | G           | <i>DEP1</i>              | H6        | Type II      | 0.991                | 0.009 |
| Longdao5            | Heilongjiang | Subgroup1 | G           | <i>DEP1</i>              | H6        | Type II      | 0.962                | 0.038 |
| Longjing13          | Heilongjiang | Subgroup1 | G           | <i>DEP1</i>              | H6        | Type II      | 0.984                | 0.016 |
| Longjing14          | Heilongjiang | Subgroup1 | G           | <i>DEP1</i>              | H6        | Type II      | 0.972                | 0.028 |
| Longjing31          | Heilongjiang | Subgroup1 | G           | <i>DEP1</i>              | H6        | Type II      | 0.975                | 0.025 |
| Changbai13          | Jilin        | Subgroup1 | G           | <i>DEP1</i>              | H6        | Type II      | 0.956                | 0.044 |
| Changbai9           | Jilin        | Subgroup1 | G           | <i>DEP1</i>              | H6        | Type II      | 0.694                | 0.306 |
| Chaochan1           | Jilin        | Subgroup1 | G           | <i>DEP1</i>              | H6        | Type II      | 0.974                | 0.026 |
| Guandong107         | Jilin        | Subgroup1 | G           | <i>DEP1</i>              | H6        | Type II      | 0.874                | 0.126 |
| Jijing53            | Jilin        | Subgroup1 | G           | <i>DEP1</i>              | H6        | Type II      | 0.978                | 0.022 |
| Jijing62            | Jilin        | Subgroup1 | G           | <i>DEP1</i>              | H6        | Type II      | 0.937                | 0.063 |
| Jijing63            | Jilin        | Subgroup1 | G           | <i>DEP1</i>              | H6        | Type II      | 0.974                | 0.026 |

|                  |              |           |   |             |    |         |       |       |
|------------------|--------------|-----------|---|-------------|----|---------|-------|-------|
| Huadan995        | Liaoning     | Subgroup2 | G | <i>depl</i> | H2 | TypeIII | 0.048 | 0.952 |
| Liaojing294      | Liaoning     | Subgroup2 | G | <i>depl</i> | H2 | TypeIII | 0.015 | 0.985 |
| Liaojing454      | Liaoning     | Subgroup2 | G | <i>depl</i> | H2 | TypeIII | 0.150 | 0.850 |
| Liaojing5        | Liaoning     | Subgroup2 | G | <i>depl</i> | H2 | TypeIII | 0.175 | 0.825 |
| Liaojing9        | Liaoning     | Subgroup2 | G | <i>depl</i> | H2 | TypeIII | 0.052 | 0.948 |
| Liaoxing1        | Liaoning     | Subgroup2 | G | <i>depl</i> | H2 | TypeIII | 0.091 | 0.909 |
| Liaoxing16       | Liaoning     | Subgroup2 | G | <i>depl</i> | H2 | TypeIII | 0.397 | 0.603 |
| Liaoxing17       | Liaoning     | Subgroup2 | G | <i>depl</i> | H2 | TypeIII | 0.363 | 0.637 |
| Shendao29        | Liaoning     | Subgroup2 | G | <i>depl</i> | H2 | TypeIII | 0.103 | 0.897 |
| Shendao3         | Liaoning     | Subgroup2 | G | <i>depl</i> | H2 | TypeIII | 0.014 | 0.986 |
| Shendao6         | Liaoning     | Subgroup2 | G | <i>depl</i> | H2 | TypeIII | 0.008 | 0.992 |
| Shendao9         | Liaoning     | Subgroup2 | G | <i>depl</i> | H2 | TypeIII | 0.096 | 0.904 |
| Shennong265      | Liaoning     | Subgroup2 | G | <i>depl</i> | H2 | TypeIII | 0.010 | 0.990 |
| Shennong606      | Liaoning     | Subgroup2 | G | <i>depl</i> | H2 | TypeIII | 0.072 | 0.928 |
| Shennong9741     | Liaoning     | Subgroup2 | G | <i>depl</i> | H2 | TypeIII | 0.020 | 0.980 |
| Shenjing4311     | Liaoning     | Subgroup2 | C | <i>depl</i> | H3 | TypeIII | 0.031 | 0.969 |
| Baimaodao        | Heilongjiang | Subgroup2 | C | <i>DEP1</i> | H4 | Type II | 0.250 | 0.750 |
| Chuxing          | Japan        | Subgroup2 | C | <i>DEP1</i> | H4 | Type II | 0.033 | 0.967 |
| Huachuilei       | Japan        | Subgroup2 | C | <i>DEP1</i> | H4 | Type II | 0.027 | 0.973 |
| Lige             | Japan        | Subgroup2 | C | <i>DEP1</i> | H4 | Type II | 0.008 | 0.992 |
| Muyu             | Japan        | Subgroup2 | C | <i>DEP1</i> | H4 | Type II | 0.042 | 0.958 |
| Qiutianxiaoding  | Japan        | Subgroup2 | C | <i>DEP1</i> | H4 | Type II | 0.010 | 0.990 |
| Wuji             | Japan        | Subgroup2 | C | <i>DEP1</i> | H4 | Type II | 0.013 | 0.987 |
| Xindai           | Japan        | Subgroup2 | G | <i>DEP1</i> | H4 | Type II | 0.009 | 0.991 |
| Yanshouchuanshou | Japan        | Subgroup2 | C | <i>DEP1</i> | H4 | Type II | 0.009 | 0.991 |
| Yimuhu           | Japan        | Subgroup2 | C | <i>DEP1</i> | H4 | Type II | 0.011 | 0.989 |
| Jiyujing         | Jilin        | Subgroup2 | C | <i>DEP1</i> | H4 | Type II | 0.258 | 0.742 |
| Liaoyan2         | Liaoning     | Subgroup2 | C | <i>DEP1</i> | H4 | Type II | 0.027 | 0.973 |
| Kendao2          | Heilongjiang | Subgroup2 | G | <i>DEP1</i> | H6 | Type II | 0.398 | 0.602 |
| Longjing8        | Heilongjiang | Subgroup2 | G | <i>DEP1</i> | H6 | Type II | 0.335 | 0.665 |
| Huaxiang         | Japan        | Subgroup2 | G | <i>DEP1</i> | H6 | Type II | 0.027 | 0.973 |
| Fengjin          | Japan        | Subgroup2 | C | <i>DEP1</i> | H7 | Type I  | 0.029 | 0.971 |
| Liaojing371      | Liaoning     | Subgroup2 | C | <i>DEP1</i> | H7 | Type I  | 0.276 | 0.724 |

Supplemental Table 6. Physical and chemical properties of type I, type II and type III protein

| Protein | Amino acid change |             |         |         | Haplotype | No of aa | Molecular weight | pI   | Grain per panicle |
|---------|-------------------|-------------|---------|---------|-----------|----------|------------------|------|-------------------|
|         | A (102)           | A (193-423) | A (225) | A (321) |           |          |                  |      |                   |
| I       | Cys               | 231a        | His     | Ser     | 7         | 423      | 44802            | 8.36 | 129.54±12.2a      |
| II      | Tyr               | 231a        | Leu     | Cys     | 4, 5, 6   | 423      | 44854            | 8.36 | 107.55±10.1b      |
| III     | Tyr               | -           | -       | -       | 1, 2, 3   | 192      | 21193            | 8.57 | 142.55±20.1c      |

Within a column, data followed by different lowercase letters indicate significant difference at 5% probability levels.

Supplemental Table 7. Descriptive statistics, family mean-basis heritability and percentage of phenotypic variation explained by population structure

| Trait   | Min  | Max   | Mean  | CV (%) | $H_m^2$ | $R^2$ |
|---------|------|-------|-------|--------|---------|-------|
| HD (d)  | 93.0 | 125.0 | 105.7 | 7.7    | 81.6    | 52.6  |
| PL (cm) | 13.3 | 28.0  | 18.4  | 11.5   | 97.4    | 0.7   |
| PBN     | 7.0  | 15.0  | 10.7  | 19.9   | 57.7    | 20.1  |
| SBN     | 10.2 | 41.2  | 21.9  | 29.7   | 70.5    | 4.5   |
| GPP     | 61.5 | 194.8 | 121.6 | 24.5   | 56.1    | 14.2  |
| TGW (g) | 19.5 | 29.4  | 25.2  | 8.2    | 30.8    | 0.5   |

$H_m^2$ , Broad-sense heritability on family mean basis

$R^2$ , Percentage of phenotypic variation explained by population structure

HD: Heading date, PL: panicle length, NPB: number of primary branches, NSB: number of secondary branches, GPP: number of grain per panicle, TGW: 1,000 grain weight.
